# Supplementary material
Source: PubMed Central journal article supplement (PMC6812653)

1  
2  
3  
4 **Figure S1 Estimating IC<sub>50</sub> of MSeA in human pancreatic cancer cells.**

5  
6 Colo357, Bxpc-3, HPAC cells were treated for 2 days; PANC28 was treated for 3 days with  
7  
8 MSeA, with exposure concentrations as shown. The cell growth half maximal inhibitory  
9  
10 concentration (IC<sub>50</sub>): 0.6 μM at 48 h in Colo357 cells; 1.15 μM at 48 h in Bxpc-3 cells; 3.7  
11  
12 μM at 48 h in HPAC cells; 1.2 μM at 72 h in PANC-28 cells, respectively  
13  
14  
15

16  
17  
18 **Figure S2 Induction of apoptosis and autophagy upon MSeA treatment in additional**

19 **cell lines.** Immunoblot detection of c-PARP (apoptosis) and LC3 II (autophagy) in protein  
20  
21 lysates from 2 μM MSeA-treated various pancreatic cancer cells at different time courses as  
22  
23 indicated. β-actin served as a loading control.  
24  
25  
26  
27  
28  
29  
30  
31  
32  
33  
34  
35  
36  
37  
38  
39  
40  
41  
42  
43  
44  
45  
46  
47  
48  
49  
50  
51  
52  
53  
54  
55  
56  
57  
58  
59  
60

Wang Supplemental data:

**Fig. S1** Cell crystal violet staining assay for cell growth.

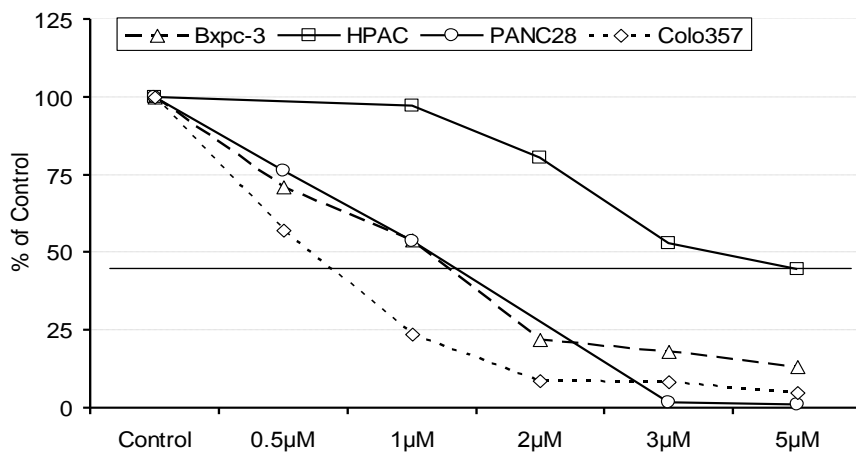

**Fig. S2**

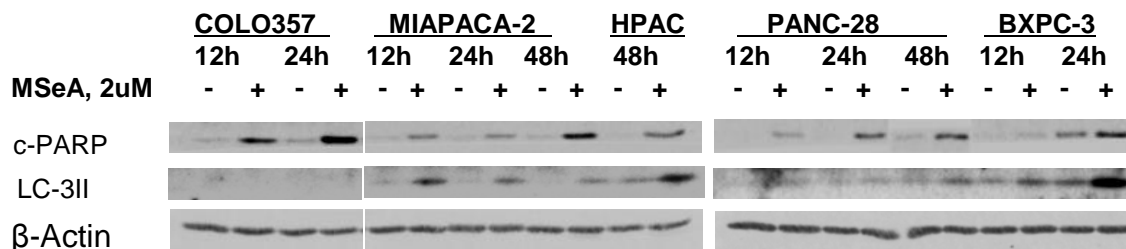

Supplement: NIHMS1054510-supplement-1.pdf [file NIHMS1054510-supplement-1.pdf]
